# Supplementary material
Source: publisher site journal article supplement (https://www.dovepress.com/article/473583)
Supplement: Supplementary file 1 [file get_supplementary_file.php]

STROBE Statement—checklist of items that should be included in reports of observational studies

**Agreement between clinical and histopathological diagnoses of oral and maxillofacial lesions and influencing factors: a cross-sectional study**

|  | Item No. | Recommendation | Page  No. | Relevant text from manuscript |
| --- | --- | --- | --- | --- |
| **Title and abstract** | 1 | (*a*) Indicate the study’s design with a commonly used term in the title or the abstract | 1 | Agreement between clinical and histopathological diagnoses of oral and maxillofacial lesions and influencing factors: a cross-sectional study |
| (*b*) Provide in the abstract an informative and balanced summary of what was done and what was found | 1-2 | **Purpose:** Diagnosing oral and maxillofacial lesions is a multi-step, multidisciplinary process. If a clinical diagnosis is achievable, then a histopathological diagnosis is indicated to support and confirm the diagnosis. Biopsy with histopathological examination are therefore an essential part of the diagnosis and/or treatment plan. The purpose of this study was to investigate the agreement between the clinical and histopathological diagnoses of oral and maxillofacial lesions.  **Patients and methods:** This was an observational, cross-sectional study of all patients who had been referred to the Oral Pathology Central Laboratory at the Faculty of Dentistry and University Dental Hospital at King Abdulaziz University in Jeddah, Saudi Arabia, between 2018 and 2022 for diagnosis of oral and maxillofacial lesions. Data extracted include information about the referring dental provider such as the clinical experience of the practitioner (number of years), specialty, certification, and education. Agreement between the clinical and histopathological diagnoses was evaluated, and logistic regression was used to assess provider characteristics associated with the accuracy of diagnosis.  **Results:** The clinical and pathological diagnoses were concordant in 44.6% (n = 378) of cases, and concordance was highest for odontogenic tumors (72.7%, n=24), significantly higher than for inflammatory lesions (37.3%, n = 111). Clinical diagnoses made by oral surgeons were 1.6-times more likely to be the same as the pathological diagnosis compared with those made by other specialties when controlling for education, certification, and years of experience.  **Conclusion:** These data are a reminder that a clinical diagnosis alone is not sufficient to secure the final diagnosis and to plan treatment. Histopathological examination remains essential for the majority of oral and maxillofacial lesions. |
| Introduction | | | |  |
| Background/rationale | 2 | Explain the scientific background and rationale for the investigation being reported | 3-4 | See introduction. |
| Objectives | 3 | State specific objectives, including any prespecified hypotheses | 4 | Our null hypothesis was that the final (histopathological) diagnosis is not concordant with the primary (clinical) diagnosis. |
| Methods | | | |  |
| Study design | 4 | Present key elements of study design early in the paper | 4 | This was a descriptive, retrospective study of all patients referred to the Oral Pathology Central Laboratory at the KAUFD and UDH in Jeddah, Saudi Arabia, between 2018 and 2022 for biopsy of an oral and maxillofacial lesionand who subsequently received a histopathological report (n = 858) |
| Setting | 5 | Describe the setting, locations, and relevant dates, including periods of recruitment, exposure, follow-up, and data collection | 4-5 | This was a descriptive, retrospective study of all patients referred to the Oral Pathology Central Laboratory at the KAUFD and UDH in Jeddah, Saudi Arabia, between 2018 and 2022 for biopsy of an oral and maxillofacial lesionand who subsequently received a histopathological report (n = 858). There were no age restrictions. Inclusion criteria were a complete clinical file; definitive diagnosis based on histopathological examination of a tissue biopsy; whether a single biopsy or multiple biopsies were taken; and an oral and maxillofacial lesion confined to the oral cavity that involved one or more of the following: bone, connective tissue, glandular tissue, or mucosa. Exclusion criteria were histopathology reports originating at another laboratory or institution and lesions located outside the oral and maxillofacial area.  Diagnostic classifications were adapted from Barnes [16] and Bezroukov [17]. Cases with inconclusive pathologic diagnoses were classified as miscellaneous, inconclusive, or nonspecific diagnoses. All records were retrieved from the KAUFD electronic health record system and the Oral Pathology Central Laboratory, as this laboratory was established in 2018 under the UDH and all records are documented in an electronic system. Biopsies were examined in the oral pathology central laboratory, which also accepts referrals from specialists and consultants who work in clinics outside KAUFD and UDH.  The retrieved information included patient characteristics (age and gender); location of the lesion; the nature of the lesion (benign or malignant); surface characteristics of peripheral lesions; the intraosseous or soft tissue origin of the lesion; and the clinical and histopathological diagnoses. For each patient, care provider information, i.e., the number of years of clinical experience and professional rank, were recorded. Professional ranks were categorized into undergraduate students, postgraduate students (MSc or PhD students), Saudi Board residents, GDPs, and specialists or consultants. The two authors, consultants in oral medicine and oral pathology, reviewed all oral pathology reports and evaluated the agreement between the clinical and histopathological diagnoses for each patient. Cases of disagreement were discussed until a consensus was reached |
| Participants | 6 | (*a*) *Case-control study*—Give the eligibility criteria, and the sources and methods of case ascertainment and control selection. Give the rationale for the choice of cases and controls | 4-5 | See above |
| Variables | 7 | Clearly define all outcomes, exposures, predictors, potential confounders, and effect modifiers. Give diagnostic criteria, if applicable | 4-5 | See above |
| Data sources/ measurement | 8* | For each variable of interest, give sources of data and details of methods of assessment (measurement). Describe comparability of assessment methods if there is more than one group | 4-5 | See above |
| Bias | 9 | Describe any efforts to address potential sources of bias | NA | NA |
| Study size | 10 | Explain how the study size was arrived at | 4 | See above |

Continued on next page

| Quantitative variables | 11 | Explain how quantitative variables were handled in the analyses. If applicable, describe which groupings were chosen and why | 5 | Data were analyzed using the SPSS v20 (IBM SPSS Statistics, Armonk, NY). Descriptive statistics were used to described the characteristics of the study variables in the form of frequencies and percentages for categorical variables and means and standard deviations (SD) for continuous variables. Chi-squared tests were used to assess relationships between categorical variables. Logistic regression was used to assess which provider characteristics were associated with correct diagnoses. Statistical significance was set at the 5% level. |
| --- | --- | --- | --- | --- |
| Statistical methods | 12 | (*a*) Describe all statistical methods, including those used to control for confounding | 5 | See above |
| (*b*) Describe any methods used to examine subgroups and interactions | NA | NA |
| (*c*) Explain how missing data were addressed | NA | NA |
| (*d*) *Cohort study*—If applicable, explain how loss to follow-up was addressed  *Case-control study*—If applicable, explain how matching of cases and controls was addressed  *Cross-sectional study*—If applicable, describe analytical methods taking account of sampling strategy | 5 | See above |
| (*e*) Describe any sensitivity analyses | NA | NA |
| Results | | | | |
| Participants | 13* | (a) Report numbers of individuals at each stage of study—eg numbers potentially eligible, examined for eligibility, confirmed eligible, included in the study, completing follow-up, and analysed | 5 | This descriptive retrospective study included data from 858 patients with oral and maxillofacial lesions seen between 2018 and 2022, |
| (b) Give reasons for non-participation at each stage | NA | NA |
| (c) Consider use of a flow diagram | NA | NA |
| Descriptive data | 14* | (a) Give characteristics of study participants (eg demographic, clinical, social) and information on exposures and potential confounders | 5 | Over half of the referring dentists were consultants (59.2%, n = 508), and the rest were postgraduate students (26.1%, n = 224), board residents (11.3%, n = 97), and undergraduate students (3.4%, n = 29). Referrals were most often from oral surgeons (45.1%, n = 387) followed by endodontists (22.6%, n =194). Over half of referrals (58.9%, n = 505) were from dentists with >5 years of experience. |
| (b) Indicate number of participants with missing data for each variable of interest | NA | NA |
| Outcome data | 15* | *Cohort study*—Report numbers of outcome events or summary measures over time | NA | NA |
| *Case-control study—*Report numbers in each exposure category, or summary measures of exposure | NA | NA |
| *Cross-sectional study—*Report numbers of outcome events or summary measures | 6 | See text |
| Main results | 16 | (*a*) Give unadjusted estimates and, if applicable, confounder-adjusted estimates and their precision (eg, 95% confidence interval). Make clear which confounders were adjusted for and why they were included | 6-7 | See text |
| (*b*) Report category boundaries when continuous variables were categorized | 6-7 | See text |
| (*c*) If relevant, consider translating estimates of relative risk into absolute risk for a meaningful time period | 6-7 | See text |

Continued on next page

| Other analyses | 17 | Report other analyses done—eg analyses of subgroups and interactions, and sensitivity analyses | NA | NA |
| --- | --- | --- | --- | --- |
| Discussion | | | | |
| Key results | 18 | Summarise key results with reference to study objectives | 7-10 | See text |
| Limitations | 19 | Discuss limitations of the study, taking into account sources of potential bias or imprecision. Discuss both direction and magnitude of any potential bias | 9-10 | See text |
| Interpretation | 20 | Give a cautious overall interpretation of results considering objectives, limitations, multiplicity of analyses, results from similar studies, and other relevant evidence | 10 | See text |
| Generalisability | 21 | Discuss the generalisability (external validity) of the study results | 9-10 | See text |
| Other information | |  | | |
| Funding | 22 | Give the source of funding and the role of the funders for the present study and, if applicable, for the original study on which the present article is based | 10 | See text |

*Give information separately for cases and controls in case-control studies and, if applicable, for exposed and unexposed groups in cohort and cross-sectional studies.

**Note:** An Explanation and Elaboration article discusses each checklist item and gives methodological background and published examples of transparent reporting. The STROBE checklist is best used in conjunction with this article (freely available on the Web sites of PLoS Medicine at http://www.plosmedicine.org/, Annals of Internal Medicine at http://www.annals.org/, and Epidemiology at http://www.epidem.com/). Information on the STROBE Initiative is available at www.strobe-statement.org.
